# Supplementary material for: The medically managed patient with severe symptomatic aortic stenosis in the TAVR era: Patient characteristics, reasons for medical management, and quality of shared decision making at heart valve treatment centers
Source: PLoS One. 2017 Apr 21;12(4):e0175926. doi: 10.1371/journal.pone.0175926 (PMC5400246; doi:10.1371/journal.pone.0175926)
Supplement: S2 File — (XLSX) [file pone.0175926.s003.xlsx]

## Sheet: Original Reasons Med Mgmt 118 
		Original Reasons for Medical Management Categories in ASCS Survey
KEY for PLOS	Final Adjudication for Inclusion/Exclusion	Patient Preference	Medical Futility	Acute MI 30 days	Contra Anticoag	Inoperable or anatomic infeasibility	Inadequate Access for TAVR	Other	Other: Reason
007-156		0 = No	1 = Yes	0 = No	0 = No	0 = No	0 = No	0 = No
007-157		0 = No	0 = No	0 = No	0 = No	0 = No	0 = No	1 = Yes	BAV to decide
007-158	Exclude	0 = No	0 = No	0 = No	0 = No	0 = No	0 = No	1 = Yes	moderate AS, reasses as needed
007-161	Exclude	0 = No	0 = No	0 = No	0 = No	0 = No	0 = No	1 = Yes	AS felt not bad enough yet
141-342		1 = Yes	0 = No	0 = No	0 = No	0 = No	0 = No	0 = No
141-345	Exclude	1 = Yes	0 = No	0 = No	0 = No	0 = No	0 = No	1 = Yes	Lack of Syptoms
141-346		1 = Yes	0 = No	0 = No	0 = No	0 = No	0 = No	1 = Yes	Prohibitive Risk for TAVR secondary to co-morbid issues and high risk for renal failure
141-352	Exclude	0 = No	0 = No	0 = No	0 = No	0 = No	0 = No	1 = Yes	not good candidate for SAVR/TAVR
141-353		0 = No	0 = No	0 = No	0 = No	0 = No	0 = No	1 = Yes	Patient is being evaluated for possible TAVR in the future
141-358	Exclude	0 = No	0 = No	0 = No	0 = No	0 = No	0 = No	1 = Yes	Didn't qualify for on current trial
141-362	Exclude	1 = Yes	0 = No	0 = No	0 = No	0 = No	0 = No	1 = Yes	Symptoms unlikley due to Aortic Stenosis
141-367		1 = Yes	0 = No	0 = No	0 = No	0 = No	0 = No	1 = Yes	Patient to pursue possible TAVR at another facility
141-370		0 = No	0 = No	0 = No	0 = No	0 = No	0 = No	1 = Yes	Patient is being evaluated for possible TAVR in future
141-375	Exclude	0 = No	0 = No	0 = No	0 = No	0 = No	0 = No	1 = Yes	Cobalt chest radiation
141-379		1 = Yes	0 = No	0 = No	0 = No	0 = No	0 = No	0 = No
141-391		0 = No	0 = No	0 = No	0 = No	0 = No	0 = No	1 = Yes	not ready for intervention
141-394		1 = Yes	0 = No	0 = No	0 = No	0 = No	0 = No	0 = No
141-398		0 = No	0 = No	0 = No	0 = No	0 = No	1 = Yes	0 = No
141-405		1 = Yes	0 = No	0 = No	0 = No	0 = No	0 = No	1 = Yes	Very High Risk and Frailty Factor High with other Co-Morbid Issues
141-409	Exclude	0 = No	0 = No	0 = No	0 = No	0 = No	0 = No	1 = Yes	pt thoguht not severe enough for treatment at that time
141-420	Exclude	0 = No	0 = No	0 = No	0 = No	0 = No	0 = No	1 = Yes	not severe enough for TAVR
141-423		1 = Yes	0 = No	0 = No	0 = No	0 = No	0 = No	0 = No
141-430	Exclude	0 = No	0 = No	0 = No	0 = No	0 = No	0 = No	1 = Yes	too early for intervention
141-431		0 = No	0 = No	0 = No	0 = No	0 = No	1 = Yes	0 = No
141-434	Exclude	0 = No	0 = No	0 = No	0 = No	0 = No	0 = No	1 = Yes	asymptomatic
141-435	Exclude	0 = No	0 = No	0 = No	0 = No	0 = No	0 = No	1 = Yes	asymptomatic
141-441		1 = Yes	0 = No	0 = No	0 = No	0 = No	0 = No	0 = No
141-442		0 = No	0 = No	0 = No	0 = No	0 = No	0 = No	1 = Yes	Patient was evaluated in 2011 for PARTNER IIA but was not very symptomatic at that time and decided not to go forward at that time. Is still not symptomatic (STS too low) for TAVR.
141-447		0 = No	0 = No	0 = No	0 = No	1 = Yes	0 = No	0 = No
141-448		1 = Yes	0 = No	0 = No	0 = No	0 = No	0 = No	1 = Yes	Patient refuses SAVR. STS too low for TAVR
141-450		0 = No	0 = No	0 = No	0 = No	0 = No	0 = No	1 = Yes	did not fit criteria for current trial
141-451		0 = No	0 = No	0 = No	0 = No	0 = No	1 = Yes	1 = Yes	Patient is inoperable and is currently being evaluated for possible alternative access
141-452		0 = No	0 = No	0 = No	0 = No	0 = No	0 = No	1 = Yes	waiting for intermediate trial to open
422-753		0 = No	0 = No	0 = No	0 = No	0 = No	0 = No	1 = Yes	symptoms due to COPD
422-761	Exclude	0 = No	0 = No	0 = No	0 = No	0 = No	0 = No	1 = Yes	no active symptoms
422-763		0 = No	0 = No	0 = No	0 = No	0 = No	0 = No	1 = Yes	Active GI bleeding
422-766		0 = No	0 = No	0 = No	0 = No	0 = No	0 = No	1 = Yes	Patient is in the transition period and will considered for TAVR and treated with BAV and PCI on 4/28/2014 in a mean time
422-770		1 = Yes	0 = No	0 = No	0 = No	0 = No	0 = No	0 = No
422-774	Exclude	0 = No	0 = No	0 = No	0 = No	0 = No	0 = No	1 = Yes	Severe COPD, O2 dependent
422-775		0 = No	0 = No	0 = No	0 = No	1 = Yes	0 = No	0 = No
422-776	Exclude	0 = No	0 = No	0 = No	0 = No	0 = No	0 = No	1 = Yes	moderate AS, reassess
422-779		1 = Yes	0 = No	0 = No	0 = No	0 = No	0 = No	1 = Yes	surgeon wanted to wait
422-801	Exclude	0 = No	0 = No	0 = No	0 = No	0 = No	0 = No	1 = Yes	asymptomatic
422-808	Exclude	0 = No	0 = No	0 = No	0 = No	0 = No	0 = No	1 = Yes	not severe enough for intervention
422-810		1 = Yes	0 = No	0 = No	0 = No	0 = No	0 = No	0 = No
422-811		0 = No	0 = No	0 = No	0 = No	0 = No	1 = Yes	0 = No
422-815	Exclude	0 = No	0 = No	0 = No	0 = No	0 = No	0 = No	1 = Yes	AS is not severe
422-818	Exclude	0 = No	0 = No	0 = No	0 = No	0 = No	0 = No	1 = Yes	AS with low gradient
422-828	Exclude	0 = No	0 = No	0 = No	0 = No	0 = No	0 = No	1 = Yes	Waiting to get critical aortic stenosis
422-831	Exclude	0 = No	0 = No	0 = No	0 = No	0 = No	0 = No	1 = Yes	asymptomatic
422-834		0 = No	0 = No	0 = No	0 = No	1 = Yes	1 = Yes	0 = No
422-836	Exclude	0 = No	0 = No	0 = No	0 = No	0 = No	0 = No	1 = Yes	patient currently asymptomatic
422-853	Exclude	1 = Yes	0 = No	0 = No	0 = No	0 = No	0 = No	1 = Yes	Symptoms Possibly Secondary to Underlying Lung Disease and CAD requiring PCI
422-861	Exclude	1 = Yes	0 = No	0 = No	0 = No	0 = No	0 = No	1 = Yes	asymptomatic
422-863	Exclude	1 = Yes	0 = No	0 = No	0 = No	0 = No	0 = No	1 = Yes	Lack of Symptoms
422-864		0 = No	0 = No	0 = No	0 = No	0 = No	0 = No	1 = Yes	low platelets, waiting for new valve to be FDA approved
422-869	Exclude	0 = No	0 = No	0 = No	0 = No	0 = No	0 = No	1 = Yes	Not severe AS
422-871		0 = No	0 = No	1 = Yes	0 = No	0 = No	0 = No	0 = No
422-877		1 = Yes	0 = No	0 = No	0 = No	0 = No	0 = No	0 = No
422-878	Exclude	0 = No	0 = No	0 = No	0 = No	0 = No	0 = No	1 = Yes	Not bad enough for consideration
422-879		1 = Yes	0 = No	0 = No	0 = No	0 = No	0 = No	0 = No
422-890		1 = Yes	0 = No	0 = No	0 = No	0 = No	0 = No	0 = No
422-891		0 = No	0 = No	0 = No	0 = No	0 = No	0 = No	1 = Yes	waiting for new trial to begin
422-892		0 = No	0 = No	0 = No	0 = No	0 = No	0 = No	1 = Yes	She was being considered for possible TAVR however due to upcoming bladder surgery patient had BAV on 12/16/2013 to temporize symptoms of aortic stenosis.
422-896		0 = No	1 = Yes	0 = No	0 = No	0 = No	0 = No	0 = No
422-897	Exclude	0 = No	0 = No	0 = No	0 = No	0 = No	0 = No	1 = Yes	not warrented
422-900		0 = No	0 = No	0 = No	0 = No	0 = No	0 = No	1 = Yes	clinically stable, high risk surgical
422-903	Exclude	1 = Yes	0 = No	0 = No	0 = No	0 = No	0 = No	1 = Yes	Lack Of Symptoms
422-907		0 = No	0 = No	0 = No	0 = No	0 = No	0 = No	1 = Yes	Study unavailable for valve size
422-908		1 = Yes	0 = No	0 = No	0 = No	0 = No	0 = No	1 = Yes	Patient has several other issues (including Dementia) and chose to be medically managed until further notice
422-909		1 = Yes	0 = No	0 = No	0 = No	0 = No	0 = No	1 = Yes	Patient would like TAVR but chose to wait until he is certain
422-913	Exclude	1 = Yes	0 = No	0 = No	0 = No	0 = No	0 = No	1 = Yes	Lack of Symptoms
422-915		0 = No	0 = No	0 = No	0 = No	0 = No	0 = No	1 = Yes	Respiratory failure secondary to pneumonia. Salvage BAV
422-921		0 = No	1 = Yes	0 = No	0 = No	0 = No	0 = No	1 = Yes	progressive dementia
422-925		0 = No	0 = No	1 = Yes	0 = No	0 = No	0 = No	0 = No
422-926		0 = No	0 = No	0 = No	0 = No	0 = No	0 = No	1 = Yes	Requires Lung Biopsy for Mass; Needs Definitive Diagnosis and Prognosis of Life Expectancy >18 Months
616-1002	Exclude	0 = No	0 = No	0 = No	0 = No	0 = No	0 = No	1 = Yes	no symptoms at this point
616-1006	Exclude	0 = No	0 = No	0 = No	0 = No	0 = No	0 = No	1 = Yes	Valve not with severe stenosis yet
616-1007	Exclude	0 = No	0 = No	0 = No	0 = No	0 = No	0 = No	1 = Yes	asymptomatic
616-1011		1 = Yes	0 = No	0 = No	0 = No	0 = No	0 = No	1 = Yes	Patient came from Tenessee, did not follow up
616-1017		0 = No	0 = No	0 = No	0 = No	0 = No	0 = No	1 = Yes	Waiting for his valve to become critical to enroll into clinical trials
616-1022		0 = No	0 = No	0 = No	0 = No	1 = Yes	0 = No	0 = No
616-1024	Exclude	0 = No	0 = No	0 = No	0 = No	0 = No	0 = No	1 = Yes	no significant symptoms
616-1029		0 = No	0 = No	0 = No	0 = No	0 = No	0 = No	1 = Yes	High STS score. Expected to be in better conditions for a future TAVR
616-1033	Exclude	0 = No	0 = No	0 = No	0 = No	0 = No	0 = No	1 = Yes	too early for intervention
616-1035		0 = No	0 = No	0 = No	0 = No	0 = No	0 = No	1 = Yes	EF 10%
616-1036		0 = No	0 = No	0 = No	0 = No	0 = No	0 = No	1 = Yes	Unclear of benefits of TAVR / BAV to bridge
616-1037		0 = No	1 = Yes	0 = No	0 = No	0 = No	0 = No	0 = No
616-1042		0 = No	0 = No	0 = No	0 = No	0 = No	0 = No	1 = Yes	EF 15%
616-1043	Exclude	0 = No	0 = No	0 = No	0 = No	0 = No	0 = No	1 = Yes	no cardiac symptoms
616-1047		0 = No	0 = No	0 = No	0 = No	0 = No	1 = Yes	0 = No
616-1048	Exclude	0 = No	0 = No	0 = No	0 = No	0 = No	0 = No	1 = Yes	asymptomatic
616-1049	Exclude	0 = No	0 = No	0 = No	0 = No	0 = No	0 = No	1 = Yes	Moderate AS
616-1053		0 = No	0 = No	0 = No	0 = No	1 = Yes	0 = No	0 = No
616-1057		0 = No	0 = No	0 = No	0 = No	0 = No	0 = No	1 = Yes	Jehova's witness. Needs a 20 mm TAVR valve currently not available
616-1058	Exclude	0 = No	0 = No	0 = No	0 = No	0 = No	0 = No	1 = Yes	Moderate AS and Moderate MR
616-1059	Exclude	0 = No	0 = No	0 = No	0 = No	0 = No	0 = No	1 = Yes	asymptomatic
616-1061	Exclude	0 = No	0 = No	0 = No	0 = No	0 = No	0 = No	1 = Yes	asymptomatic
616-1069	Exclude	0 = No	0 = No	0 = No	0 = No	0 = No	0 = No	1 = Yes	too soon for intervention
616-1072		1 = Yes	0 = No	0 = No	0 = No	0 = No	0 = No	1 = Yes	pt has bicuspid valve and unable to participate in valve trials at time of screening. pt refused surgery
616-1076	Exclude	0 = No	0 = No	0 = No	0 = No	0 = No	0 = No	1 = Yes	asymptomatic
616-1078		0 = No	0 = No	0 = No	0 = No	0 = No	0 = No	1 = Yes	Unlikely patient will benefit from AVR
616-1086		0 = No	0 = No	0 = No	0 = No	1 = Yes	0 = No	1 = Yes	Bicuspid
616-1090	Exclude	0 = No	0 = No	0 = No	0 = No	0 = No	0 = No	1 = Yes	Moderate AS and asymptomatic
616-1091		1 = Yes	0 = No	0 = No	0 = No	0 = No	0 = No	0 = No
616-1092	Exclude	0 = No	0 = No	0 = No	0 = No	0 = No	0 = No	1 = Yes	slow progression
616-1096		0 = No	0 = No	0 = No	0 = No	0 = No	1 = Yes	0 = No
616-1102	Exclude	0 = No	0 = No	0 = No	0 = No	0 = No	0 = No	1 = Yes	AS not severe
991-594		1 = Yes	0 = No	0 = No	0 = No	0 = No	0 = No	0 = No
991-596		1 = Yes	0 = No	0 = No	0 = No	0 = No	0 = No	0 = No
991-597		0 = No	1 = Yes	0 = No	0 = No	0 = No	0 = No	0 = No
991-602		0 = No	0 = No	0 = No	0 = No	0 = No	0 = No	1 = Yes	bridge to determine
991-608		0 = No	0 = No	0 = No	0 = No	0 = No	0 = No	1 = Yes	Patient is being evaluated fro possible TAVR in future
991-610	Exclude	0 = No	0 = No	0 = No	0 = No	0 = No	0 = No	1 = Yes	MD decided AS not bad enough yet
991-611		1 = Yes	0 = No	0 = No	0 = No	0 = No	0 = No	1 = Yes	Patient did not qualify for TAVR (STS too low); Refuses surgery
991-614		0 = No	0 = No	0 = No	0 = No	0 = No	0 = No	1 = Yes	.
991-615		0 = No	1 = Yes	0 = No	0 = No	0 = No	0 = No	0 = No
991-619		0 = No	1 = Yes	0 = No	0 = No	0 = No	0 = No	0 = No
MM Sample Criteria for PLOS One Data Set
Excluded because Timeliness of Referral = Too Early
Added to Exclusion Group because "Other Reason for MM" equivalent to Asymptomatic OR Not Severe AS OR Patient sxs not attributed to AS
Added to Exclusion Group because "Other" is only Reason specified AND Valve >=1 AND Gradient <40 AND no BAV

## Sheet: Final Reasons Med Mgmt 71
		Original Reasons for Medical Management Categories in ASCS Survey							Final Adjudicated Reasons for Medical Management Categories (Post Hoc)
KEY for PLOS	Final Reasons for Med Management	Patient Preference	Medical Futility	Acute MI in Past 30 days	Contraindication to Anticoagulation	Inoperable or anatomic infeasibility	Inadequate Access for TAVR	Other: Reason	Bridging with BAV	Unable to Get Commercial TAVR	Palliative BAV	Evaluation Ongoing	Bicuspid AV	Concurrent acute illness	Symptoms Attributed to Other Condition	Considering TAVR Elsewhere	Still Considering AVR	Unknown	Row Total
007-156	Futility		1																1
007-157	Bridging with balloon aortic valvicoplasty							BAV to decide	1										1
141-342	Patient preference	1																	1
141-346	Patient preference; medical futility	1	1					Prohibitive Risk for TAVR secondary to co-morbid issues and high risk for renal failure											2
141-353	Evaluation ongoing							Patient is being evaluated for possible TAVR in the future				1							1
141-367	Patient preference Considering TAVR elsewhere	1						Patient to pursue possible TAVR at another facility								1			2
141-370	Evaluation ongoing							Patient is being evaluated for possible TAVR in future				1							1
141-379	Patient preference	1																	1
141-391	Patient preference	1						not ready for intervention											1
141-394	Patient preference, Bridging BAV	1							1										2
141-398	Inadequate access for TAVR						1												1
141-405	Patient preference; medical futility	1	1					Very High Risk and Frailty Factor High with other Co-Morbid Issues											2
141-423	Patient preference	1																	1
141-431	Inadequate access for TAVR						1												1
141-441	Patient preference	1																	1
141-442	Unable to get commerical TAVR							Patient was evaluated in 2011 for PARTNER IIA but was not very symptomatic at that time and decided not to go forward at that time. Is still not symptomatic (STS too low) for TAVR.		1									1
141-447	Inoperable or anatomic infeasibility					1 = Yes													1
141-448	Unable to get commerical TAVR							Patient refuses SAVR. STS too low for TAVR		1									1
141-450	Unable to get commerical TAVR							did not fit criteria for current trial		1									1
141-451	Inoperable (includes anatomic infeasibility for TAVR); Evaluation ongoing					1		Patient is inoperable and is currently being evaluated for possible alternative access				1							2
141-452	Unable to get commerical TAVR							waiting for intermediate trial to open		1									1
422-753	Symptoms attributed to other comorbidity							symptoms due to COPD							1				1
422-763	Concurrent acute illness, bridging BAV							Active GI bleeding	1					1					2
422-766	Bridging with BAV; Evaluation ongoing							Patient is in the transition period and will considered for TAVR and treated with BAV and PCI on 4/28/2014 in a mean time	1			1							2
422-770	Patient preference	1																	1
422-775	Inoperable or anatomic infeasibility					1 = Yes													1
422-779	Patient preference	1						surgeon wanted to wait											1
422-810	Patient preference	1																	1
422-811	Inadequate access for TAVR						1												1
422-834	Inoperable or anatomic infeasibility; Inadequate access for TAVR					1 = Yes	1 = Yes												2
422-864	Unable to get commerical TAVR							low platelets, waiting for new valve to be FDA approved		1									1
422-871	Medical futility; Acute MI within 30 days		1	1 = Yes															2
422-877	Patient preference	1																	1
422-879	Patient preference	1																	1
422-890	Patient preference	1																	1
422-891	Unable to get commerical TAVR							waiting for new trial to begin		1									1
422-892	Bridging with balloon aortic valvuloplasty							She was being considered for possible TAVR however due to upcoming bladder surgery patient had BAV on 12/16/2013 to temporize symptoms of aortic stenosis.	1										1
422-896	Medical futility		1																1
422-900	Unknown							clinically stable, high risk surgical										1	1
422-907	Unable to get commerical TAVR							Study unavailable for valve size		1									1
422-908	Patient preference; Futility	1	1					Patient has several other issues (including Dementia) and chose to be medically managed until further notice											2
422-909	Patient preference	1						Patient would like TAVR but chose to wait until he is certain											1
422-915	Concurrent acute illness; Bridging with BAV							Respiratory failure secondary to pneumonia. Salvage BAV	1					1					2
422-921	Futility		1					progressive dementia											1
422-925	Acute MI within 30 days			1 = Yes															1
422-926	Evaluation ongoing, Bridging BAV							Requires Lung Biopsy for Mass; Needs Definitive Diagnosis and Prognosis of Life Expectancy >18 Months	1			1							2
616-1011	Patient preference	1						Patient came from Tenessee, did not follow up											1
616-1017	Unable to get commerical TAVR							Waiting for his valve to become critical to enroll into clinical trials		1									1
616-1022	Inoperable or anatomic infeasibility					1 = Yes													1
616-1029	Evaluation ongoing, Bridging BAV							High STS score. Expected to be in better conditions for a future TAVR	1			1							2
616-1035	Medical futility		1					EF 10%											1
616-1036	Bridging with balloon aortic valvuloplasty							Unclear of benefits of TAVR / BAV to bridge	1										1
616-1037	Futility		1																1
616-1042	Medical futility		1					EF 15%											1
616-1047	Inadequate access for TAVR						1												1
616-1053	Inoperable or anatomic infeasibility					1 = Yes													1
616-1057	Unable to get commerical TAVR, Bridging BAV							Jehova's witness. Needs a 20 mm TAVR valve currently not available	1	1									2
616-1072	Inoperable (includes anatomic infeasibility for TAVR); unable to get commercial TAVR	1				1		pt has bicuspid valve and unable to participate in valve trials at time of screening. pt refused surgery					1						3
616-1078	Medical futility		1					Unlikely patient will benefit from AVR											1
616-1086	Inoperable or anatomic infeasibility; Bicuspid Aortic Valve					1 = Yes		Bicuspid					1						2
616-1091	Patient preference	1																	1
616-1096	Inadequate access for TAVR						1												1
991-594	Patient preference	1																	1
991-596	Patient preference	1																	1
991-597	Futility		1																1
991-602	Bridging with balloon aortic valvuloplasty							bridge to determine	1										1
991-608	Evaluation ongoing							Patient is being evaluated fro possible TAVR in future				1							1
991-611	Unable to get commerical TAVR							Patient did not qualify for TAVR (STS too low); Refuses surgery		1									1
991-614	Unknown							.										1	1
991-615	Futility		1																1
991-619	Medical futility		1																1
																			88
	COLUMN TOTALS	22	14	2	0	8	6		11	10	0	7	2	2	1	1	0	2
